# Supplementary material for: Anti-Inflammatory Flavonoids from Agrimonia pilosa Ledeb: Focusing on Activity-Guided Isolation
Source: MDPI journal article supplement (doi:10.3390/molecules29020283), 2024-01-05
Supplement: s1 [file s1]

## Supporting Information

### Compound 7: Apigenin-7-O- $\beta$ -D-glucuronide-butyl-ester

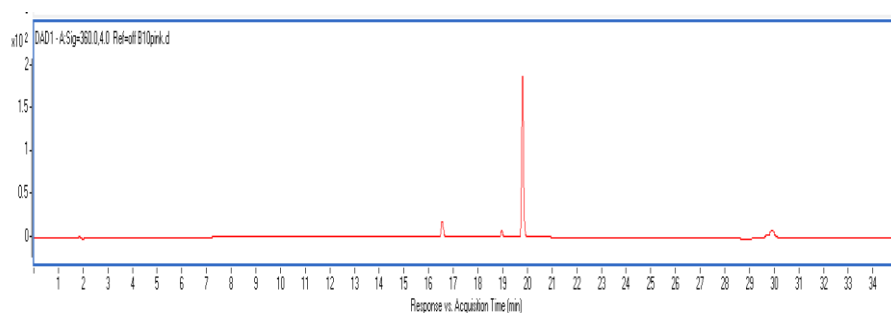

**Figure S1.** HPLC chromatogram of compound 7 (MeOH) at 360 nm (Purity 91 %).

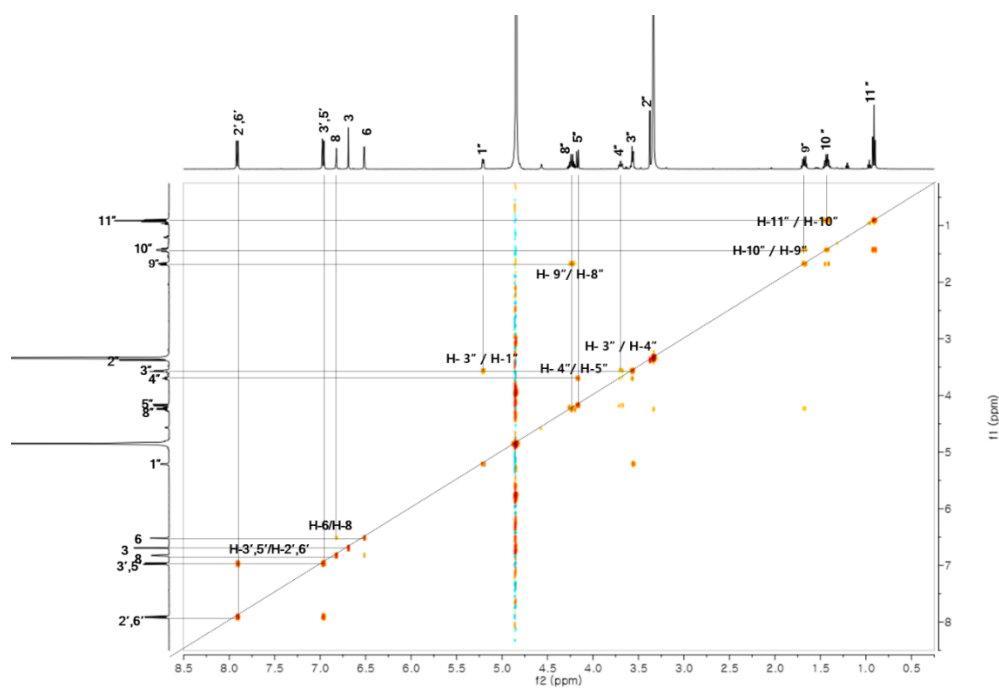

**Figure S2.** <sup>1</sup>H-<sup>1</sup>H COSY spectrum of compound 7 (MeOH-*d*<sub>4</sub>).

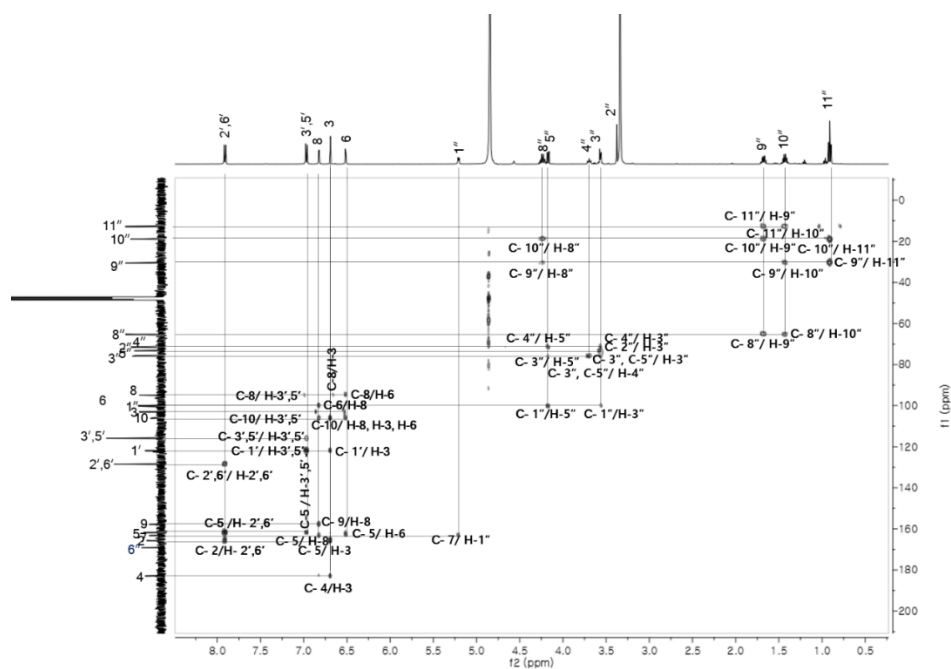

**Figure S3.** HMBC spectrum of compound **7** (MeOH- $d_4$ ).

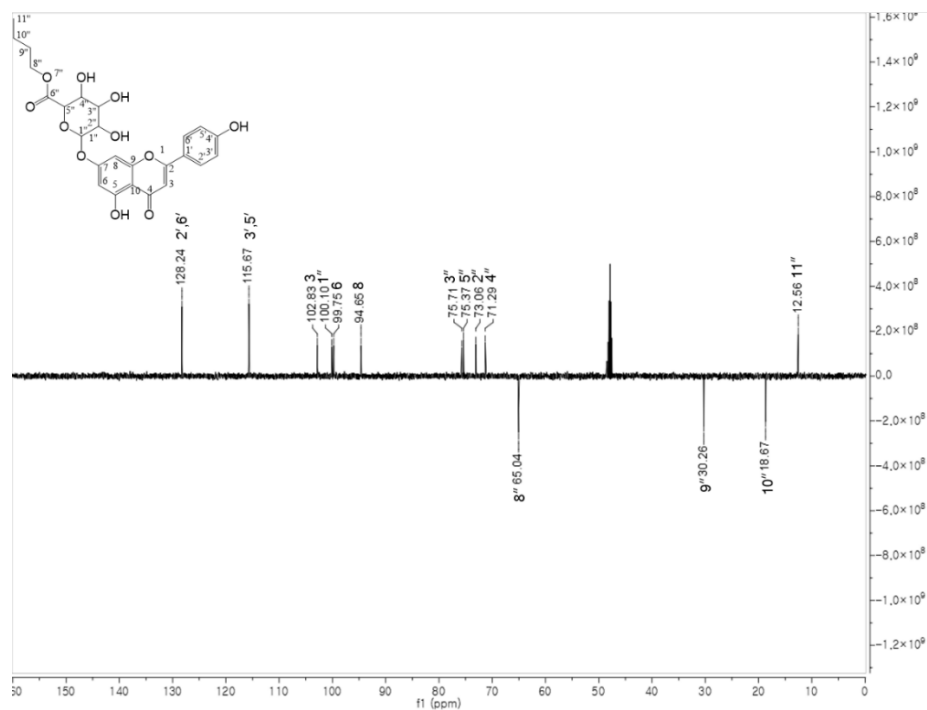

**Figure S4.** DEPT spectrum of compound **7** (MeOH- $d_4$ ).

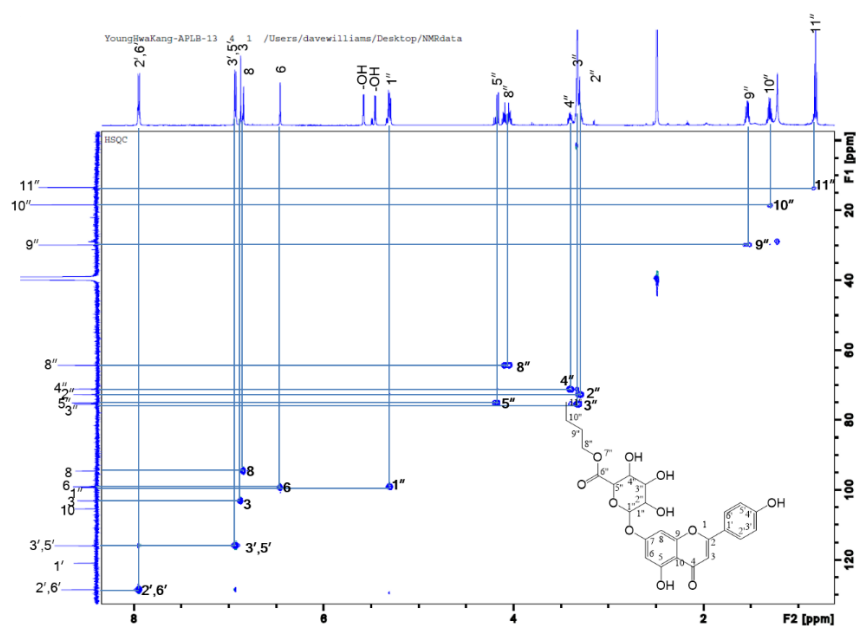

**Figure S5.** HSQC spectrum of compound **7** (MeOH-*d*<sub>4</sub>).

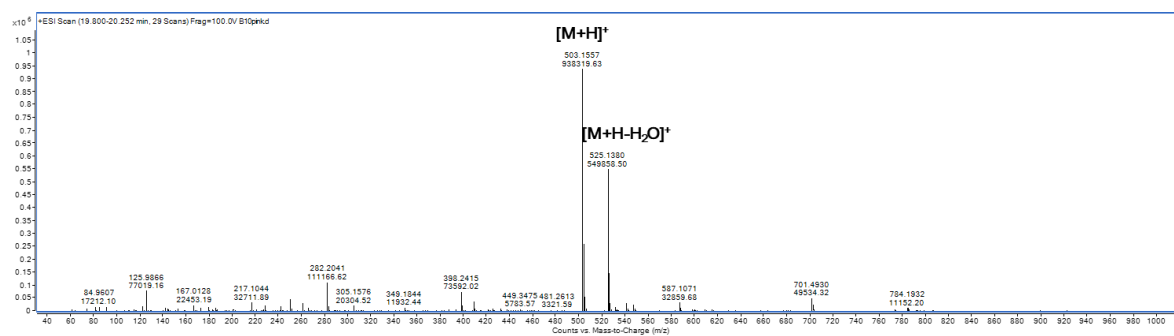

**Figure S6.** HR-ESI-MS spectra of compound **7**.

**Table S1.** <sup>1</sup>H NMR Spectroscopic Data for Compounds (**1-6**) <sup>a</sup>.

| Compound               | Quercetin-7- <i>O</i> -β-D-rhamnoside ( <b>1</b> ) | Apigenin-7- <i>O</i> -β-D-glucopyranoside ( <b>2</b> ) | Kaempferol-7- <i>O</i> -β-D-glucopyranoside ( <b>3</b> ) |
|------------------------|----------------------------------------------------|--------------------------------------------------------|----------------------------------------------------------|
| Position               | $\delta_H$ (mult, <i>J</i> , int) <sup>b</sup>     | $\delta_H$ (mult, <i>J</i> , int) <sup>c</sup>         | $\delta_H$ (mult, <i>J</i> , int) <sup>c</sup>           |
| <i>Aglycone</i>        |                                                    |                                                        |                                                          |
| 6                      | 6.19 (d, <i>J</i> = 2.0 Hz, 1H)                    | 6.46 (d, <i>J</i> = 2.2 Hz, 1H)                        | 6.44 (d, <i>J</i> = 2.0 Hz, 1H)                          |
| 8                      | 6.35 (d, <i>J</i> = 1.9 Hz, 1H)                    | 6.85 (d, <i>J</i> = 2.2 Hz, 1H)                        | 6.83 (d, <i>J</i> = 2.0 Hz, 1H)                          |
| 2'                     | 7.37 (d, <i>J</i> = 2.0 Hz, 1H)                    | 7.96 (d, <i>J</i> = 8.9 Hz, 2H)                        | 7.94 (d, <i>J</i> = 8.7 Hz, 2H)                          |
| 3'                     |                                                    | 6.95 (d, <i>J</i> = 8.9 Hz, 2H)                        | 6.93 (d, <i>J</i> = 8.7 Hz, 2H)                          |
| 5'                     | 6.95 (d, <i>J</i> = 8.3 Hz, 1H)                    | 6.95 (d, <i>J</i> = 8.9 Hz, 2H)                        | 6.93 (d, <i>J</i> = 8.7 Hz, 2H)                          |
| 6'                     | 7.33 (dd, <i>J</i> = 2.0 Hz, 1H)                   | 7.96 (d, <i>J</i> = 8.9 Hz, 2H)                        | 7.94 (d, <i>J</i> = 8.7 Hz, 2H)                          |
| <i>Glucopyranoside</i> |                                                    |                                                        |                                                          |
| 1''                    | 5.35 (d, <i>J</i> = 7.3 Hz, 1H)                    | 5.07 (d, <i>J</i> = 7.5 Hz, 1H)                        | 5.06 (d, <i>J</i> = 7.3 Hz, 1H)                          |
| 2''                    | 3.38 (t, <i>J</i> = 4.7 Hz, 1H)                    |                                                        |                                                          |
| 3''                    | 4.22 (d, <i>J</i> = 9.4 Hz, 1H)                    | 3.33-3.20 (m, 3H)                                      | 3.25-3.16 (m, 3H)                                        |
| 4''                    | 3.44 (dd, <i>J</i> = 9.4, 6.1 Hz, 1H)              |                                                        |                                                          |
| 5''                    | 4.22 (d, <i>J</i> = 9.4 Hz, 1H)                    | 3.71 (d, <i>J</i> = 9.9 Hz, 1H)                        | 3.62 (d, <i>J</i> = 9.4 Hz, 1H)                          |
| 6''                    | 3.36-3.31 (m, 2H)                                  | 3.20 (m, 1H)                                           | 3.16 (m, 1H)                                             |
| -CH <sub>3</sub>       | 0.97 (d, <i>J</i> = 6.1 Hz, 3H)                    |                                                        |                                                          |

<sup>a</sup> Recorded in MeOH-*d*<sub>4</sub> and DMSO-*d*<sub>6</sub> at 500/125 MHz (TMS as internal standard); chemical shifts, multiplicity, and couplingconstants (*J*, Hz) were assigned by means of <sup>1</sup>H <sup>b</sup> MeOH-*d*<sub>4</sub>, <sup>c</sup> DMSO-*d*<sub>6</sub>

**Table S1.** (Continued). <sup>1</sup>H NMR Spectroscopic data for Compounds (**1-6**)<sup>a</sup>.

| Compound        | Quercetin ( <b>4</b> )                                  | Kaempferol ( <b>5</b> )                                 | Apigenin ( <b>6</b> )                                   |
|-----------------|---------------------------------------------------------|---------------------------------------------------------|---------------------------------------------------------|
| Position        | $\delta_{\text{H}}$ (mult, <i>J</i> , int) <sup>b</sup> | $\delta_{\text{H}}$ (mult, <i>J</i> , int) <sup>c</sup> | $\delta_{\text{H}}$ (mult, <i>J</i> , int) <sup>c</sup> |
| <i>Aglycone</i> |                                                         |                                                         |                                                         |
| 3               |                                                         |                                                         | 6.77 (s, 1H)                                            |
| 6               | 6.20 (d, <i>J</i> = 2.0 Hz, 1H)                         | 6.48 (d, <i>J</i> = 2.0 Hz, 1H)                         | 6.22 (d, <i>J</i> = 2.2 Hz, 1H)                         |
| 8               | 6.43 (d, <i>J</i> = 2.0 Hz, 1H)                         | 6.86 (d, <i>J</i> = 2.0 Hz, 1H)                         | 6.51 (d, <i>J</i> = 2.2 Hz, 1H)                         |
| 2'              | 7.67 (d, <i>J</i> = 2.0 Hz, 1H)                         | 7.95 (d, <i>J</i> = 8.6 Hz, 2H)                         | 7.93 (d, <i>J</i> = 8.9 Hz, 2H)                         |
| 3'              |                                                         | 6.94 (d, <i>J</i> = 8.8 Hz, 2H)                         | 6.94 (d, <i>J</i> = 8.9 Hz, 2H)                         |
| 5'              | 6.90 (d, <i>J</i> = 8.5 Hz, 1H)                         | 6.94 (d, <i>J</i> = 8.8 Hz, 2H)                         | 6.94 (d, <i>J</i> = 8.9 Hz, 2H)                         |
| 6'              | 7.54 (dd, <i>J</i> = 8.5, 2.0 Hz, 1H)                   | 7.95 (d, <i>J</i> = 8.6 Hz, 2H)                         | 7.93 (d, <i>J</i> = 8.9 Hz, 2H)                         |

<sup>a</sup> Recorded in MeOH-*d*<sub>4</sub> and DMSO-*d*<sub>6</sub> at 500/125 MHz (TMS as internal standard); chemical shifts, multiplicity, and coupling constants (*J*, Hz) were assigned by means of <sup>1</sup>H<sup>b</sup>MeOH-*d*<sub>4</sub>, <sup>c</sup>DMSO-*d*<sub>6</sub>
